# Supplementary material for: Genomic prediction for yield and malting traits in barley using metabolomic and near-infrared spectra
Source: PubMed Central journal article supplement (PMC11717810; doi:10.1007/s00122-024-04806-7), 2025-01-09
Supplement: 122_2024_4806_MOESM1_ESM.pdf [file 122_2024_4806_MOESM1_ESM.pdf]

## Supplementary material 1

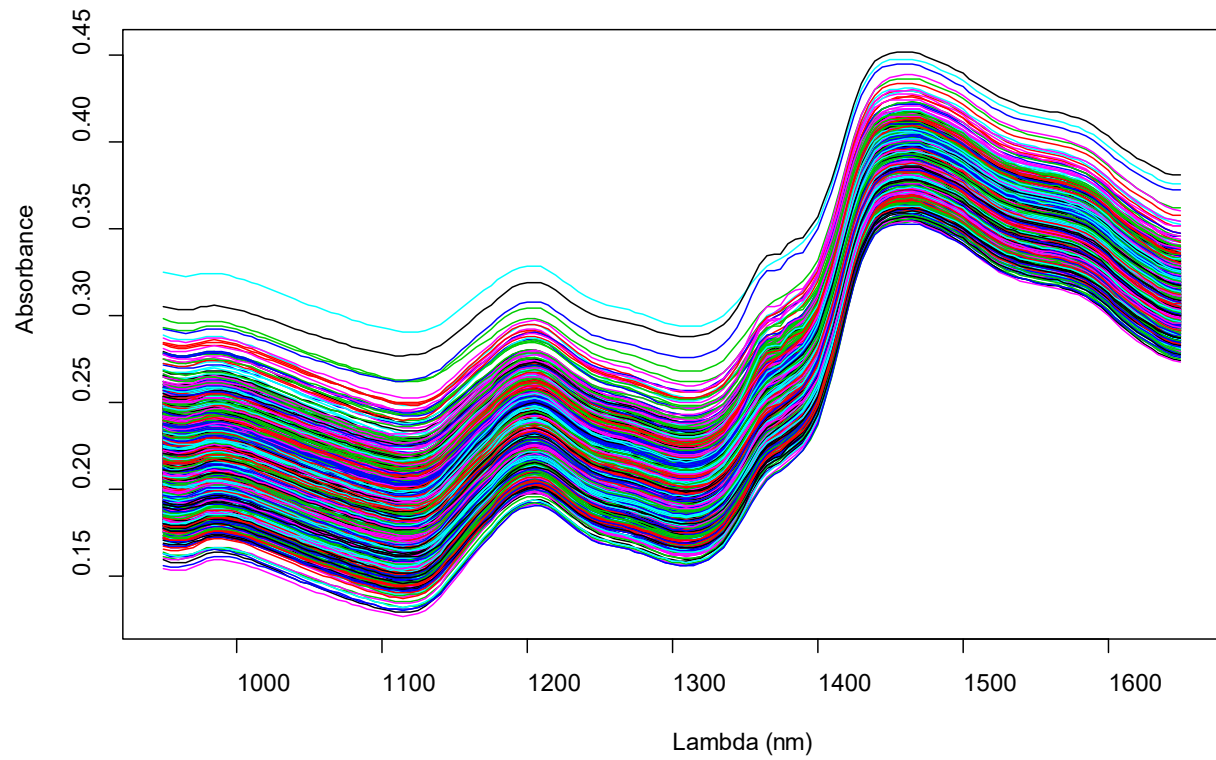

**Figure S1.** Change in absorbance from 950 to 1650 nm for raw NIR wavelengths (lines with different colors) for whole barley grain after malting.

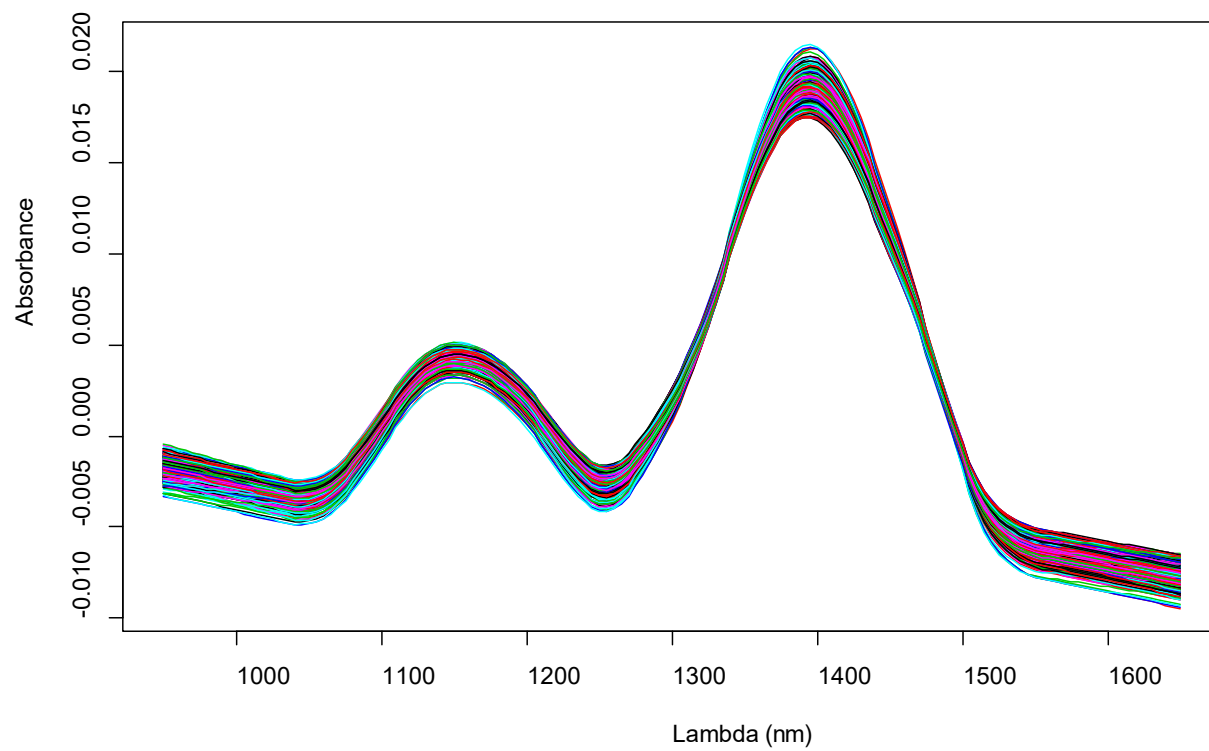

**Figure S2.** Change in absorbance from 950 to 1650 nm for NIR wavelengths after Savitzky-Golay transformation (lines with different colors) for whole barley grain after malting.
