# Supplementary material for: Genomic prediction for yield and malting traits in barley using metabolomic and near-infrared spectra
Source: PubMed Central journal article supplement (PMC11717810; doi:10.1007/s00122-024-04806-7), 2025-01-09
Supplement: 122_2024_4806_MOESM2_ESM.pdf [file 122_2024_4806_MOESM2_ESM.pdf]

## Supplementary material 2

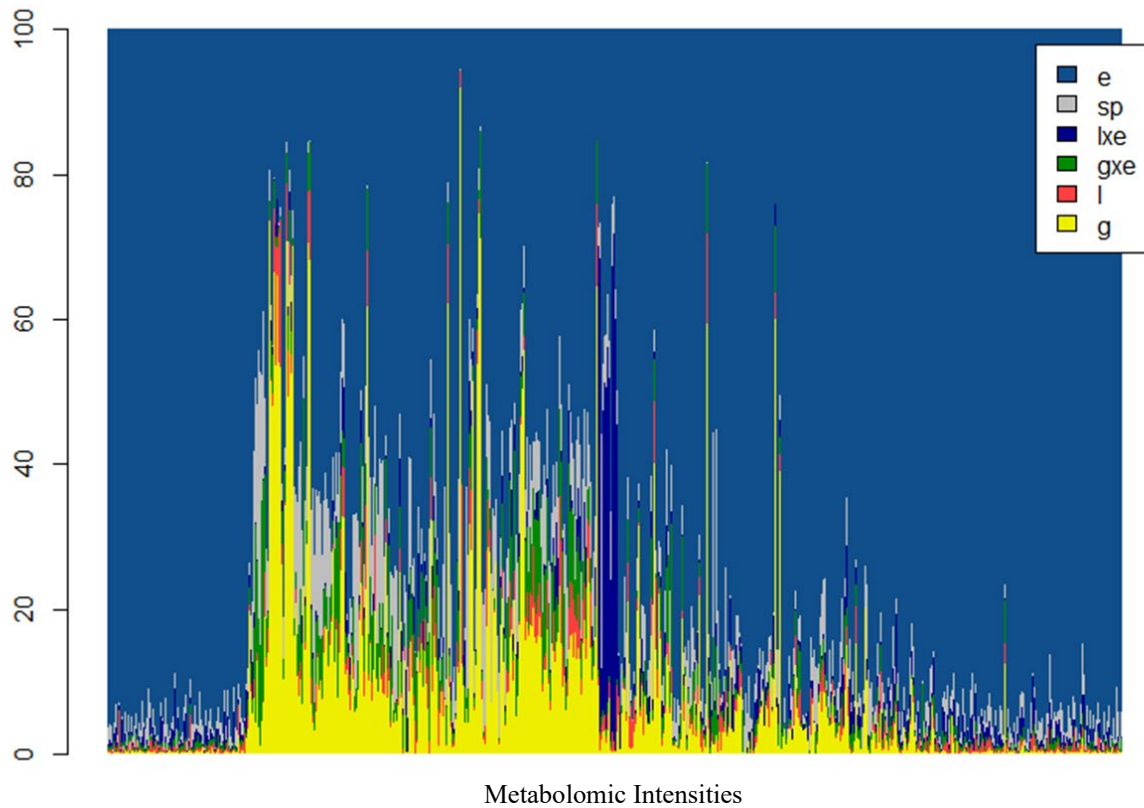

**Figure S3.** Relative proportion (%) of variance components for metabolomics intensities (MIs); g: additive genomic variance; l: line variance; gxe: genomic additive-by-environment interaction variance; lxe: line-by-environment interaction variance; sp: spatial variance; e: residual variance.

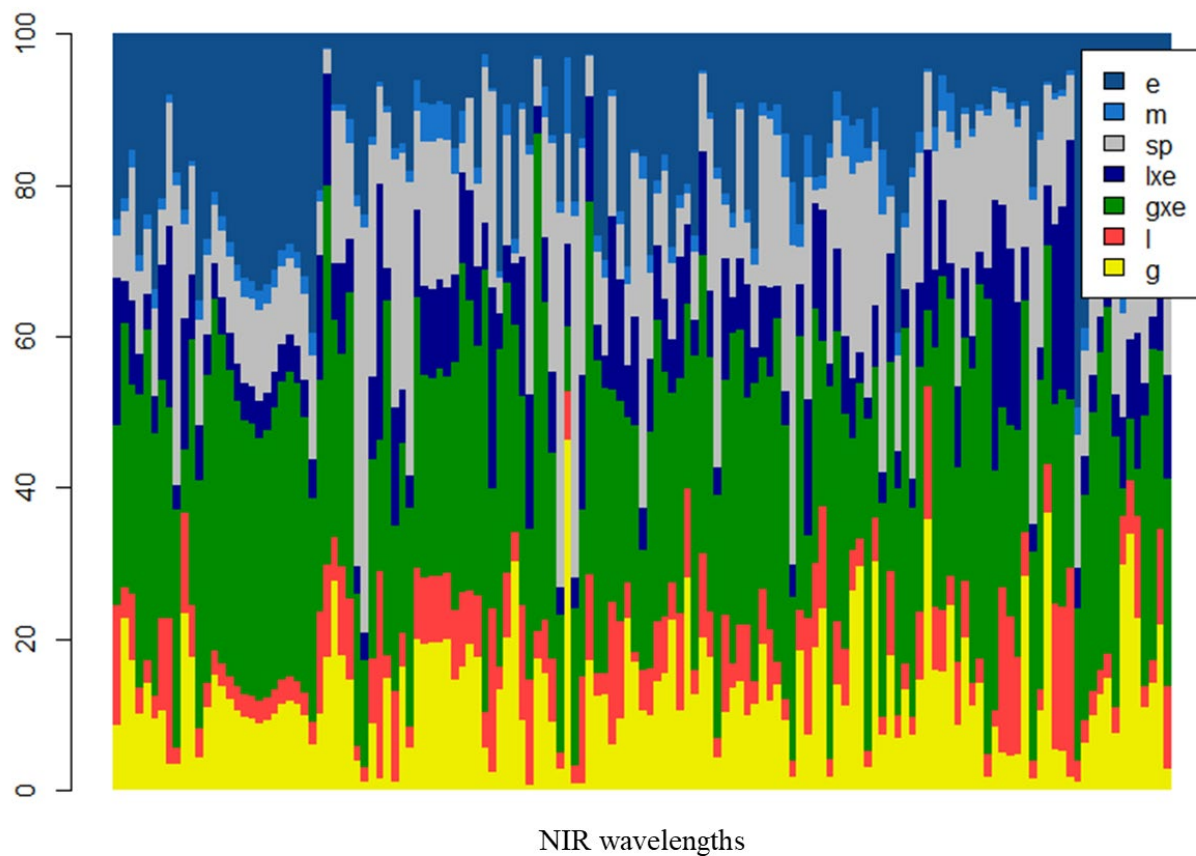

**Figure S4.** Relative proportion (%) of variance components for NIR wavelengths; g: additive genomic variance; l: line variance; gxe: genomic additive-by-environment interaction variance; lxe: line-by-environment interaction variance; sp: spatial variance; m: malting group variance; e: residual variance.
